1 **Quality control implementation for universal characterization of**  
2 **DNA and RNA viruses in clinical respiratory samples using single**  
3 **metagenomic next-generation sequencing workflow**

4 A. Bal<sup>1, 2, 3, 4</sup> antonin.bal@chu-lyon.fr  
5 M. Pichon<sup>1, 2, 3</sup> maxime.pichon01@chu-lyon.fr  
6 C. Picard<sup>5</sup> caroline.picard@pasteur.fr  
7 JS. Casalegno<sup>1, 2, 3</sup> jean-sebastien.casalegno@chu-lyon.fr  
8 M. Valette<sup>1, 2, 3</sup> martine.valette@chu-lyon.fr  
9 I. Schuffenecker<sup>1</sup> isabelle.schuffenecker@chu-lyon.fr  
10 L. Billard<sup>6</sup> billardl29@gmail.com  
11 S. Vallet<sup>6, 7</sup> sophie.vallet@chu-brest.fr  
12 G. Vilchez<sup>4</sup> gaelle.vilchez@chu-lyon.fr  
13 V. Cheynet<sup>4</sup> valerie.cheynet@biomerieux.com  
14 G. Oriol<sup>4</sup> guy.oriol@biomerieux.com  
15 S. Assant<sup>4</sup> sophie.assant@chu-lyon.fr  
16 Y. Gillet<sup>8</sup> yves.gillet@chu-lyon.fr  
17 B. Lina<sup>1, 2, 3</sup> bruno.lina@chu-lyon.fr  
18 K. Brengel-Pesce<sup>4</sup> karen.brengel-pesce@biomerieux.com  
19 F. Morfin<sup>1, 2, 3</sup> florence.morfin-sherpa@chu-lyon.fr  
20 L. Josset<sup>1, 2, 3</sup> laurence.josset@chu-lyon.fr

21 <sup>1</sup>Laboratoire de Virologie, Institut des Agents Infectieux, Groupement Hospitalier Nord, Hospices Civils de  
22 Lyon, Lyon, France

23 <sup>2</sup>Univ Lyon, Université Lyon 1, Faculté de Médecine Lyon Est, CIRI, Inserm U1111 CNRS UMR5308, Virpath,  
24 Lyon, France

25 <sup>3</sup>Hospices Civils de Lyon, Centre National de Référence des virus respiratoires France Sud, Lyon, France

26 <sup>4</sup>Laboratoire Commun de Recherche HCL-bioMerieux, Centre Hospitalier Lyon Sud, Pierre-Bénite, France

27 <sup>5</sup>Unité de Biologie des Infections Virales Emergentes, Institut Pasteur, Lyon, France; CIRI Inserm U1111,  
28 CNRS 5308, ENS, UCBL, Faculté de Médecine Lyon Est, Université de Lyon, Lyon, France.

29 <sup>6</sup>INSERM UMR1078 "Génomique, Génétique Fonctionnelle et Biotechnologies", Axe Microbiota, Univ Brest,  
30 Brest, France

31 <sup>7</sup>Département de Bactériologie-Virologie, Hygiène et Parasitologie-Mycologie, Pôle de Biologie-Pathologie,  
32 Centre Hospitalier Régional et Universitaire de Brest, Hôpital de la Cavale Blanche, Brest, France

33 <sup>8</sup>Hospices Civils de Lyon, Urgences pédiatriques, Hôpital Femme Mère Enfant, Bron, France

34 **Corresponding author:** Laurence Josset, Pharm.D, Ph.D

35 Associate Professor  
36 Hospices Civils de Lyon  
37 National reference center for respiratory viruses  
38 103 Grande-Rue de la Croix Rousse  
39 69317, Lyon  
40 France  
41 Telephone: +33 (0)4 72 07 10 22  
42 Email: laurence.josset@chu-lyon.fr

43 **Keywords:** clinical virology, quality control, next-generation sequencing; viral metagenomics; respiratory  
44 viruses

45 **Abstract**

46 **Background**

47 In recent years, metagenomic Next-Generation Sequencing (mNGS) has increasingly been  
48 used for an accurate assumption-free virological diagnosis. However, the systematic  
49 workflow evaluation on clinical respiratory samples and implementation of quality controls  
50 (QCs) is still lacking.

51 **Methods**

52 A total of 3 QCs were implemented and processed through the whole mNGS workflow: a no-  
53 template-control to evaluate contamination issues during the process; an internal and an  
54 external QC to check the integrity of the reagents, equipment, the presence of inhibitors, and  
55 to allow the validation of results for each sample. The workflow was then evaluated on 37  
56 clinical respiratory samples from patients with acute respiratory infections previously tested  
57 for a broad panel of viruses using semi-quantitative real-time PCR assays (28 positive  
58 samples including 6 multiple viral infections; 9 negative samples). Selected specimens  
59 included nasopharyngeal swabs (n = 20), aspirates (n = 10), or sputums (n = 7).

60 **Results**

61 The optimal spiking level of the internal QC was first determined in order to be sufficiently  
62 detected without overconsumption of sequencing reads. According to QC validation criteria,  
63 mNGS results were validated for 34/37 selected samples. For valid samples, viral genotypes  
64 were accurately determined for 36/36 viruses detected with PCR (viral genome coverage  
65 ranged from 0.6% to 100%, median = 67.7%). This mNGS workflow allowed the detection of  
66 DNA and RNA viruses up to a semi-quantitative PCR Ct value of 36. The six multiple viral  
67 infections involving 2 to 4 viruses were also fully characterized. A strong correlation between  
68 results of mNGS and real-time PCR was obtained for each type of viral genome ( $R^2$  ranged  
69 from 0.72 for linear single-stranded (ss) RNA viruses to 0.98 for linear ssDNA viruses).

70 **Conclusions**

71 Although the potential of mNGS technology is very promising, further evaluation studies are  
72 urgently needed for its routine clinical use within a reasonable timeframe. The approach  
73 described herein is crucial to bring standardization and to ensure the quality of the generated  
74 sequences in clinical setting. We provide an easy-to-use single protocol successfully  
75 evaluated for the characterization of a broad and representative panel of DNA and RNA  
76 respiratory viruses in various types of clinical samples.

## 77 **Background**

78           Since the development of Next Generation-Sequencing (NGS) technologies in 2005,  
79 the use of metagenomic approaches has grown considerably. It is now considered as an  
80 efficient unbiased tool in clinical virology[1,2], in particular for the characterization of viral  
81 acute respiratory infections (ARIs). Several advantages of metagenomic NGS (mNGS)  
82 compared to conventional real-time Polymerase Chain Reaction (PCR) assays have been  
83 highlighted. Firstly, the full viral genetic information is immediately available allowing the  
84 investigation of respiratory outbreaks, viral epidemiological surveillance, or identification of  
85 specific mutations leading to antiviral resistance or higher virulence [3–5]. Secondly, a  
86 significant improvement in viral ARIs diagnosis has been reported [4,6–9]; as the process is  
87 sequence independent, mNGS is able to identify highly divergent viral genomes, rare  
88 respiratory pathogens, and to discover respiratory viruses missed by targeted PCR [1,4,7].

89           However, the diversity in viral nucleic acid types has impaired the development of a  
90 unique viral metagenomic workflow allowing the comprehensive characterization of viruses  
91 present in a clinical sample. Most of the published viral metagenomic protocols have been  
92 optimized for the detection either of DNA viruses or RNA viruses [4,5,10–13]. In addition,  
93 despite the growing number of studies using a metagenomic process in clinical virology,  
94 evaluation of workflows has not systematically included both clinical samples and quality  
95 control (QC) implementation. A metagenomic protocol involves a large number of steps and  
96 all of these have to be controlled to ensure the quality of the generated sequences [6,14–16].  
97 Furthermore, specimen to specimen, environmental, and reagent contaminations are also a  
98 major concern in metagenomic setting and must be accurately evaluated [6,17–19].

99           The objective of this study was to implement QCs in a single metagenomic protocol and to  
100 evaluate it for the detection of a broad panel of DNA and RNA viruses in clinical respiratory  
101 samples.

## 102 **Methods**

### 103 **Clinical samples**

104 A total of 37 respiratory samples collected from patients hospitalized in the university  
105 hospital of Lyon (Hospices Civils de Lyon, HCL) were retrospectively selected to evaluate  
106 our metagenomic approach. Selected specimens included various types of clinical samples;  
107 nasopharyngeal swabs (n=20), aspirates (n=10), or sputums (n=7). These samples were  
108 initially sent to our laboratory for routine viral diagnosis of ARI using semi-quantitative real-  
109 time PCR assays targeting a comprehensive panel of DNA and RNA viruses (r-gene,  
110 bioMérieux, Marcy l'étoile, France). This panel included: influenza virus type A and B,  
111 adenovirus, cytomegalovirus, Epstein-Barr virus, human herpes virus 6, human bocavirus  
112 (HBoV), human rhinovirus, respiratory syncytial virus, human parainfluenza virus, human  
113 coronavirus (HCoV), human metapneumovirus, and measles virus. Twenty-two samples were  
114 positive for only one targeted virus, 6 were characterized by a multiple viral infection and 9  
115 were negative for all the targeted viruses. These 9 samples were also found to be negative  
116 using the FilmArray Respiratory Panel (FA RP, bioMérieux). After PCR testing, the rest of  
117 samples were stored at -20°C until mNGS analysis.

### 118 **Metagenomic workflow**

119 For sample viral enrichment, a 3-step method was applied to 200µl of thawed and vortexed  
120 sample [20]: low-speed centrifugation (6000g, 10 min, 4 °C), followed by filtration of the  
121 supernatant using 0.80 µm filter (Sartorius, Göttingen, Germany) to remove eukaryotic and  
122 bacterial cells, without loss of large viruses [21] and then Turbo DNase treatment (0.1U/µL,  
123 37 °C, 90 min; Life Technologies, Carlsbad, CA, USA). Total nucleic acid was extracted  
124 using the NucliSENS EasyMAG platform (bioMérieux, Marcy l'Etoile, France) followed by  
125 an ethanol precipitation (2 hours at -80°C). As previously described, modified whole  
126 transcriptome amplification was performed to amplify both DNA and RNA viral nucleic acids

127 (WTA2, Sigma-Aldrich, Darmstadt, Germany) [21]. Amplified DNA and cDNA were then  
128 purified using a QiaQuick column (Qiagen, Hilden, Germany) and quantified using the Qubit  
129 fluorometer HS dsDNA Kit (Life Technologies, Carlsbad, CA, USA). Nextera XT  
130 DNA Library preparation and Nextera XT Index Kit were used to prepare paired-end  
131 libraries, according to the manufacturer's recommendations (Illumina, San Diego, CA, USA).  
132 After normalization, a pool of libraries (V/V) was made and quantified using universal KAPA  
133 library quantification kit (Kapa Biosystems, Wilmington, MA, USA); 1% PhiX genome was  
134 added to the quantified library before sequencing with Illumina NextSeq 500™ platform  
135 (Fig. 1). In addition, it should be noticed that our wet-lab process was designed to prevent  
136 contaminations as much as possible: reagents were stored and prepared in a DNA-free room;  
137 patient samples were opened in a laminar flow hood in a pre-PCR room; after the  
138 amplification step, tubes were handled and stored in a post-PCR room.

### 139 **Bioinformatic analysis**

140 A stepwise bioinformatic filtering pipeline was used to quality filter reads using cutadapt and  
141 sickle; and to remove human, archaeal, bacterial, and fungal sequences by aligning reads with  
142 bwa mem. The databases used were GRCh38.p2, RefSeq archaea, RefSeq bacteria, and  
143 RefSeq fungi. Remaining reads were aligned on ezVIR viral database v0.1 [22] and  
144 bacteriophage genomes from the RefSeq database (downloaded on 17 February 2017) using  
145 bwa mem. Normalization for comparing viral genome coverage values was performed using  
146 reads per kilobase of virus reference sequence per million mapped reads (RPKM) ratio [4,23].  
147 RPKM ratio corrects differences in both sample sequencing depth and viral gene length. Viral  
148 reads (expressed in RPKM) from the No-Template Control (NTC) were subtracted from viral  
149 reads (in RPKM) of each sample within the batch prior to further analysis. A sample was  
150 considered to be positive for a particular virus when the RPKM of this virus was positive. No  
151 threshold regarding genome coverage pattern was applied nor requirement to cover a

152 particular region of the genome. This latter requirement could be important to correctly  
153 identify RNA virus subtypes with high recombination frequencies within a species, but has to  
154 be implemented specifically for each viral family.

### 155 **Quality control implementation**

156 All respiratory specimens were spiked with internal quality control (IQC) before sample  
157 preparation. MS2 bacteriophage from a commercial kit (MS2, IC1 RNA internal control; r-  
158 gene, bioMérieux) was selected as the IQC. As positive external quality control (EQC), we  
159 used viral transport medium spiked with MS2 at the same concentration used for the IQC. A  
160 No-Template Control (NTC) was implemented to evaluate contamination during the process.  
161 NTC was constituted of viral transport medium (Sigma-virocult, MWE, Corsham, UK) that  
162 was processed through all mNGS steps. Two QC testing (QCT) were performed: QCT1 which  
163 was the semi-quantitative detection of MS2 using a commercial real-time PCR assay (IC1  
164 RNA internal control, r-gene, bioMérieux,) after amplification step (Fig. 1). QCT1 validation  
165 criteria were: MS2 semi-quantitative PCR Cycle threshold (Ct) below 37 Ct for IQC and  
166 EQC, and no MS2 detection for NTC. QCT2 evaluated the sequencing performance by  
167 quantifying the number of reads aligned on the MS2 genome (in RPKM) and MS2 genome  
168 coverage (MS2 genome accession number: NC\_001417.2; Fig. 1). QCT2 validation criteria  
169 were MS2 genome coverage >95% for positive EQC, and an MS2 RPKM > 0 for IQC.

### 170 **Statistical analysis**

171 Statistical analyses were performed using GraphPrism version 5.02 applying the appropriate  
172 statistical test (associations between mNGS and viral real-time PCR assay were determined  
173 by applying the Pearson's correlation coefficient and differences between median and  
174 distributions were evaluated by the Mann-Whitney U test). A p-value less than 0.05 was  
175 considered to be statistically significant.

## 176 **Results**

### 177 **Determination of optimal internal quality control spiking**

178 MS2 bacteriophage (MS2), a single-stranded RNA virus (ssRNA), was used as the IQC to  
179 validate the whole metagenomic process for each sample. In order to optimize IQC spiking  
180 level, the sensitivity of the metagenomic analysis workflow for MS2 detection was first  
181 evaluated with a ten-fold serial dilutions of MS2 (from  $10^{-2}$  to  $10^{-5}$ ) in a nasopharyngeal swab  
182 tested negative using FA RP (bioMérieux). MS2 was detected in internal QCT1 (IQCT1) for  
183 all levels of MS2 spiking (Ct ranged from 17.5 at the  $10^{-2}$  dilution to 26.4 Ct at the  $10^{-5}$   
184 dilution). Full to partial MS2 genome coverage was obtained for all MS2 spiking levels in  
185 internal QCT2 (IQCT2; coverage ranged from 98% at the  $10^{-2}$  dilution to 69% at the  $10^{-5}$   
186 dilution). For the highest spiking level, 66.0% of the total number of viral reads was mapped  
187 to MS2; for the lowest spiking level, 0.9% were so (Fig. 2). To limit the number of NGS reads  
188 consumed for IQC detection, the optimal spiking condition was determined to be the  $10^{-5}$   
189 dilution and was used for the rest of the study.

### 190 **Validation of mNGS results**

191 A total of 37 clinical respiratory samples from patients with ARIs caused by a broad panel of  
192 DNA and RNA viruses or of unknown etiology were analyzed in a single mNGS workflow.  
193 Libraries were sequenced to a mean of 5,139,248 million reads passing quality filters (range:  
194 270,975 to 13,586,456 reads). Human sequences represented the main part of NGS reads for  
195 both positive samples (mean = 61.3%) and negative samples (mean = 67.1%), but not of NTC  
196 which was mainly composed of bacterial reads (67.8%). The proportion of viral reads ranged  
197 from 0.006% to 85.2% (mean = 9.6% for positive samples and 0.6 % for negative samples,  
198 Additional file 1). Viral metagenomic results were then validated according to the criteria  
199 described in the Methods section. QCT1 (MS2 molecular detection performed before library  
200 preparation) was negative for NTC. After sequencing, viral contamination represented 0.13%



201 (4,245/3,215,616) of the total reads generated from NTC including 2 MS2 reads (MS2 RPKM  
202 = 173). For targeted viruses, 21 reads (RPKM = 480) and 185 reads (RPKM = 1.1E+04)  
203 mapping to influenza A(H3N2) and HBoV were detected, respectively. The positive EQC was  
204 successfully detected at QCT1 (MS2 PCR positive at 25 Ct) and after the sequencing step  
205 (QCT2; MS2 genome coverage = 99.7%, MS2 RPKM = 5.5E+05). Regarding IQC results,  
206 37/37 samples passed QCT1 (MS2 PCR Ct values <37) and were therefore further processed.  
207 A total of 33/37 samples passed QCT2 (MS2 RPKM > 0; Fig. 3). For these 33 samples, MS2  
208 genome coverage ranged from 15% to 100% (Additional file 2).

209 The 4 samples that did not pass IQCT2 included one sputum that was previously tested  
210 negative using real-time PCR (sample # 37), one HCoV positive sputum (sample # 11, Ct =  
211 32), one HBoV positive nasopharyngeal swab (sample # 19, Ct = 30), and one  
212 nasopharyngeal aspirate tested positive for HBoV and CMV (sample # 23, Ct = 15 and 31,  
213 respectively). For sample # 37 and sample # 19, none of the real-time PCR targeted viruses  
214 were detected after bioinformatic analysis. For sample # 19, we sequenced a replicate which  
215 similarly failed both IQC and HBoV detection. We could not test any replicate for sample #  
216 37 owing to insufficient quantity. Viral metagenomics results for sample # 23 were validated  
217 as viral reads represented 85.2% (9,489,578/11,144,324) of the total reads generated (Fig. 3).  
218 For sample # 11, the number of reads mapping to HCoV was 9/5,125,947 with a HCoV  
219 genome coverage of 0.2%. Results were therefore not validated for this sample. Overall,  
220 mNGS results were validated for 34/37 samples including 26/28 positive samples and 8/9  
221 negative samples.

## 222 **Metagenomic workflow evaluation according to viral genome type**

223 The evaluation of the metagenomic workflow was performed using the 26 previously  
224 validated respiratory samples tested positive with viral real-time PCR targeting a  
225 representative panel of DNA and RNA viruses. For all 26 samples tested, viral metagenomic

226 sequencing allowed the identification of the 36/36 viral genotypes matching targeted PCR  
227 results and on-target viral genome coverage ranged from 0.6 to 100% (median = 67.7%). For  
228 these 36 targeted viruses, the real-time PCR Ct values ranged from 15 to 37 Ct (median = 28  
229 Ct). The six multiple viral infections involving from 2 to 4 different viruses were also fully  
230 characterized (Table 1). For sample # 25 (sample tested positive for 2 DNA viruses and 2  
231 RNA viruses using real-time PCR), mNGS results were cross-checked on a duplicate which  
232 reported RPKM deviations lower than 0.5 log for each targeted virus (mNGS results for the 2  
233 replicates are summarized in Additional file 3). Regarding mNGS results obtained from the 8  
234 negative samples validated with IQC, no clinically relevant virus was detected. A strong  
235 correlation between mNGS and real-time PCR results was obtained for each viral genome  
236 type ( $R^2$  ranged from 0.72 for linear ssRNA viruses to 0.98 for linear ssDNA viruses, Fig. 4a).  
237 Normalized read counts were significantly lower for linear dsDNA viruses than for other viral  
238 genome types (Fig. 4b).

239 **Discussion**

240 Over the last few years, a growing number of viral metagenomic protocols have been  
241 published but systematic evaluation on clinical respiratory samples and validation by QC is  
242 still lacking. In the present study, we describe a process allowing the sensitive detection of  
243 both DNA and RNA viruses in a single assay and implemented several QCs to validate the  
244 whole metagenomic workflow.

245 First, IQC was implemented to control the integrity of the reagents, equipment, the presence  
246 of inhibitors, and to allow the validation of mNGS results for each sample. The MS2  
247 bacteriophage was selected as IQC for three main reasons; firstly MS2 is widely used as IQC  
248 during viral real-time PCR assays to control both extraction and inhibition [24], secondly, an  
249 RNA virus was required to control the random reverse transcription and second strand  
250 synthesis steps, and thirdly MS2 is a ssRNA virus with a small genome (3,569-bp) that is  
251 perfectly characterized and therefore can be easily detected after bioinformatic analysis  
252 without the need for extensive NGS reads. The use of MS2 as an IQC has been previously  
253 reported for metagenomic analysis of cerebrospinal fluid specimens [25]. In another  
254 metagenomic study, RNA of MS2 was included after extraction as an IQC but the use of  
255 purified RNA does not validate the viral enrichment step [26]. In the protocol described  
256 herein, whole MS2 virions were added to each clinical sample from the beginning of the  
257 workflow. QCT1 was implemented to control the first steps of the process and to avoid  
258 unnecessary library preparation when these steps fail. At the end of the workflow, QCT2 was  
259 able to invalidate 2 samples as neither MS2 nor viruses causing ARIs were significantly  
260 detected after metagenomic analysis while routine PCR screenings detected a HBoV and a  
261 HCoV. The re-testing of these 2 samples found the same findings suggesting an inhibition or  
262 a competition issue during the process. Without the use of IQC, these samples would have  
263 been mistakenly classified as false negatives by mNGS. However, the expected competition

264 between viruses and MS2 during the process could lead to a non-detection of IQC reads in  
265 case of high viral load. Thus, the interpretation of IQC results should consider the proportion  
266 of viral reads of each sample. Although not observed, IQC reads may also be reduced in  
267 samples with a greater numbers of patient cells which may affect the sensitivity of the assay  
268 [25].

269 In addition to IQC, we implemented negative external control because contamination issues  
270 are frequently reported in metagenomic studies and may lead to misinterpretation in clinical  
271 practice [17]. mNGS reads in this negative control were mainly composed of bacterial reads.  
272 However, viral reads (mainly derived from prokaryote viruses) were also detected which  
273 could be present in reagents (“kitome”) or may represent laboratory contaminants or bleed-  
274 over contaminations from highly positive samples within the batch. Such contamination was  
275 observed in the present study from the highly positive HBoV sample (sample # 23, Ct=15)  
276 which contaminated the NTC (HBoV: 185 reads, RPKM = 1.1E+04 RPKM). In the clinical  
277 setting, subtracting NTC viral reads prior to interpretation of each sample result is therefore  
278 required.

279 To evaluate the workflow, clinical respiratory samples tested for a representative panel of  
280 DNA and RNA viruses using real-time PCR were selected. This workflow is based on a  
281 previous publication where a single protocol had been specifically developed for stool  
282 specimens and evaluated on mock communities containing high concentrations of spiked  
283 viruses [21]. Interestingly, 6 multiple viral infections involving both DNA and RNA viruses  
284 were fully characterized highlighting the power of our mNGS approach as a universal method  
285 for virus characterization despite the lack of common viral sequence. In addition to viruses  
286 targeted by PCR, viral reads deriving from the commensal virome, including viruses from the  
287 *Anelloviridae* family, were generated both in PCR negative and positive samples but not in  
288 the NTC.

289 Regarding the sensitivity of the mNGS approach, a wide range of semi-quantitative real-time  
290 PCR Ct values was covered. Thorburn *et al.*, compared mNGS to conventional real-time  
291 PCR for the detection of RNA viruses on nasopharyngeal swabs and reported a detection cut-  
292 off of 32 Ct for the mNGS approach [27]. Our workflow allowed the characterization of both  
293 DNA and RNA viruses up to a semi-quantitative real-time PCR Ct value of 36 which is  
294 considered to be a low viral load. A major critical point in viral metagenomics is to reduce  
295 host and bacterial components. In comparison with similar studies, viral reads herein were  
296 highly represented (mean = 7.4%); for example, a study on 16 nasopharyngeal aspirates tested  
297 positive with viral PCR assays found a mean of 0.05% of viral reads [12]. In addition, a  
298 strong correlation between results of mNGS and conventional real-time PCR was obtained by  
299 regrouping viruses according to their genome types. Similar findings were reported  
300 elsewhere, suggesting that mNGS results could be used for semi-quantitative measurement of  
301 the viral load in clinical samples [3–5,28]. A lower RPKM values for dsDNA viruses  
302 compared to the other viral genome types were noticed. As previously described for EBV and  
303 CMV, the necessary use of DNase to reduce host contamination may affect these fragile large  
304 dsDNA viruses [9,10]. As the detection limit of mNGS analysis is mainly dependent on viral  
305 load and total number of reads per sample, this effect could be overcome by increasing  
306 sequencing depth; however, we chose to limit the costs of the workflow.

307 The reagent cost of this mNGS approach is relatively low and was estimated to ~€150 thanks  
308 to our viral enrichment process and the amplification method using a commercial kit which is  
309 diluted 5-fold [21]. The use of a universal workflow for both DNA and RNA viruses also  
310 reduces the reagent cost compared with metagenomic protocols targeting DNA and RNA  
311 viruses separately. In contrast, targeted NGS of specific viruses following their specific  
312 amplification by PCR can be up to 2 times cheaper based on our experience (e.g. influenza  
313 virus sequencing [29]). Due to several limitations, including its cost and a long turnaround

314 time, viral metagenomics is currently considered to be a second-line approach and is not used  
315 as a primary routine diagnostic tool. However, with the improvement of sequencing  
316 technologies allowing real-time sequencing such as MinION sequencers (Oxford nanopore,  
317 Oxford, United Kingdom), it could be envisioned that mNGS will gradually be used for  
318 primary diagnosis in the mid-term. In case of high viral load and sufficient DNA input after  
319 amplification our workflow might be used with a MinION sequencer.

320 The approach described in this preliminary work is crucial to bring standardization for the  
321 routine clinical use of mNGS process within a reasonable timeframe. Further evaluation  
322 studies with a greater number of samples are urgently needed to establish IQC cut-off  
323 according to the number of viral, human and bacterial reads, and to define the performance of  
324 the workflow, including repeatability, reproducibility, as well as the detection limit for each  
325 virus. In addition, improvement of the bioinformatics pipeline are being explored, including  
326 implementation of threshold regarding genome coverage pattern [25], but their impact on  
327 performance of the workflow has to be established.

## 328 **Conclusion**

329 The potential of mNGS is very promising but several factors such as inhibition, competition,  
330 and contamination can lead to a dramatic misinterpretation in the clinical setting. Herein, we  
331 provide an efficient and easy to use mNGS workflow including quality controls successfully  
332 evaluated for the comprehensive characterization of a broad and representative panel of DNA  
333 and RNA viruses in various types of clinical respiratory samples.

334 **Abbreviations**

335 NGS: Next-Generation Sequencing, mNGS: metagenomic Next-Generation Sequencing,  
336 ARIs: Acute Respiratory Infections, PCR: Polymerase Chain Reaction, QC: quality controls,  
337 HCL: Hospices Civils de Lyon, IQC: Internal Quality Control, MS2: MS2 bacteriophage,  
338 EQC: External Quality Control, NTC: No-Template Control, QCT Quality Control Testing,  
339 Ct: Cycle threshold, RPKM: reads per kilobase of virus reference sequence per million  
340 mapped reads

341 **Ethics approval and consent to participate**

342 This single center retrospective study received approval from HCL board of the French data  
343 protection authority (*Commission Nationale de l'Informatique et des Libertés*) and is  
344 registered with the national data protection agency (number 17-024). Respiratory samples  
345 were collected for regular disease management during hospital stay and no additional samples  
346 were taken for this study. In accordance with French legislation relating to this type a study, a  
347 written informed consent from participants was not required for the use of de-identified  
348 collected clinical samples (Bioethics law number 2004-800 of August 6, 2004). During their  
349 hospitalization in the HCL, patients are made aware that their de-identified data including  
350 clinical samples may be used for research purposes, and they can opt out if they object to the  
351 use of their data.

352 **Consent for publication**

353 Not applicable.

354 **Availability of data and materials**

355 Data generated during this study are included in supplementary information files. Sequencing  
356 datasets used and/or analysed during the current study are available from the corresponding  
357 author on reasonable request.

358 **Competing interests**

359 AB has served as consultant to bioMérieux. KB, VC, GO are employees of bioMérieux.

360 **Funding**

361 This study was funded by a metagenomic grant received in 2014 from the French foundation  
362 of innovation in infectious diseases (FINOVI, *fondation innovation en infectiologie*).

363 **Authors' contributions**

364 AB, LJ, FM, KB SA conceived the study. AB, MP, LB, VC performed the sample  
365 preparations and sequencing. LJ, GO, GV performed bioinformatic analysis. LJ is the  
366 guarantor for the NGS data. YG, MV, IS, BL, SV, FM are the guarantor for clinical data and  
367 sample collection. AB was the main writer of the manuscript. All authors reviewed and  
368 approved the final version of the manuscript.

369 **Acknowledgments**

370 We thank Audrey Guichard, Gwendolyne Burfin, Delphine Falcon and Cecile Darley for their  
371 technical assistance as well as Philip Robinson (DRCI, Hospices Civils de Lyon) for his  
372 excellent help in manuscript preparation. Part of these data has been presented at the  
373 International Conference of Clinical Metagenomic held in Geneva in October 2017.



374 **References**

375

376 1. Mokili JL, Rohwer F, Dutilh BE. Metagenomics and future perspectives in virus  
377 discovery. *Curr Opin Virol.* 2012;2:63–77.

378 2. Capobianchi MR, Giombini E, Rozera G. Next-generation sequencing technology in  
379 clinical virology. *Clin Microbiol Infect.* 2013;19:15–22.

380 3. Prachayangprecha S, Schapendonk CME, Koopmans MP, Osterhaus ADME, Schürch AC,  
381 Pas SD, et al. Exploring the potential of next-generation sequencing in detection of  
382 respiratory viruses. *J Clin Microbiol.* 2014;52:3722–30.

383 4. Graf EH, Simmon KE, Tardif KD, Hymas W, Flygare S, Eilbeck K, et al. Unbiased  
384 Detection of Respiratory Viruses by Use of RNA Sequencing-Based Metagenomics: a  
385 Systematic Comparison to a Commercial PCR Panel. *J Clin Microbiol.* 2016;54:1000–7.

386 5. Fischer N, Indenbirken D, Meyer T, Lütgehetmann M, Lellek H, Spohn M, et al.  
387 Evaluation of Unbiased Next-Generation Sequencing of RNA (RNA-seq) as a Diagnostic  
388 Method in Influenza Virus-Positive Respiratory Samples. *J Clin Microbiol.*  
389 2015;53:2238–50.

390 6. Schlager R, Queen K, Simmon K, Tardif K, Stockmann C, Flygare S, et al. Viral  
391 Pathogen Detection by Metagenomics and Pan-Viral Group Polymerase Chain Reaction  
392 in Children With Pneumonia Lacking Identifiable Etiology. *J Infect Dis.* 2017;215:1407–  
393 15.

394 7. Xu L, Zhu Y, Ren L, Xu B, Liu C, Xie Z, et al. Characterization of the Nasopharyngeal  
395 Viral Microbiome from Children with Community-Acquired Pneumonia but Negative for  
396 Luminex xTAG Respiratory Viral Panel Assay Detection. *J Med Virol.* 2017  
397 Dec;89(12):2098-2107.

398 8. Lewandowska DW, Schreiber PW, Schuurmans MM, Ruehe B, Zagordi O, Bayard C, et  
399 al. Metagenomic sequencing complements routine diagnostics in identifying viral  
400 pathogens in lung transplant recipients with unknown etiology of respiratory infection.  
401 *PloS One.* 2017;12:e0177340.

402 9. Parize P, Muth E, Richaud C, Gratigny M, Pilmis B, Lamamy A, et al. Untargeted next-  
403 generation sequencing-based first-line diagnosis of infection in immunocompromised  
404 adults: a multicentre, blinded, prospective study. *Clin Microbiol Infect.* 2017;23:574.e1-  
405 574.e6.

406 10. Lewandowska DW, Zagordi O, Geissberger F-D, Kufner V, Schmutz S, Böni J, et al.  
407 Optimization and validation of sample preparation for metagenomic sequencing of viruses  
408 in clinical samples. *Microbiome.* 2017;5:94.

409 11. Reyes A, Haynes M, Hanson N, Angly FE, Heath AC, Rohwer F, et al. Viruses in the  
410 faecal microbiota of monozygotic twins and their mothers. *Nature.* 2010;466:334–8.

411 12. Yang J, Yang F, Ren L, Xiong Z, Wu Z, Dong J, et al. Unbiased parallel detection of viral  
412 pathogens in clinical samples by use of a metagenomic approach. *J Clin Microbiol.*  
413 2011;49:3463–9.

414 13. Kim K-H, Bae J-W. Amplification methods bias metagenomic libraries of uncultured  
415 single-stranded and double-stranded DNA viruses. *Appl Environ Microbiol.*  
416 2011;77:7663–8.

417 14. Kozyreva VK, Truong C-L, Greninger AL, Crandall J, Mukhopadhyay R, Chaturvedi V.  
418 Validation and Implementation of Clinical Laboratory Improvements Act-Compliant  
419 Whole-Genome Sequencing in the Public Health Microbiology Laboratory. *J Clin*  
420 *Microbiol.* 2017;55:2502–20.

421 15. Simner PJ, Miller S, Carroll KC. Understanding the Promises and Hurdles of  
422 Metagenomic Next-Generation Sequencing as a Diagnostic Tool for Infectious Diseases.  
423 *Clin Infect Dis.* 2018 Feb 10;66(5):778-788.

- 424 16. Ruppé E, Schrenzel J. Messages from the second International Conference on Clinical  
425 Metagenomics (ICCMg2). *Microbes Infect.* 2018 Apr;20(4):222-227.
- 426 17. Miller RR, Uyaguari-Diaz M, McCabe MN, Montoya V, Gardy JL, Parker S, et al.  
427 Metagenomic Investigation of Plasma in Individuals with ME/CFS Highlights the  
428 Importance of Technical Controls to Elucidate Contamination and Batch Effects. *PLoS*  
429 *One.* 2016;11:e0165691.
- 430 18. Thoendel M, Jeraldo P, Greenwood-Quaintance KE, Yao J, Chia N, Hanssen AD, et al.  
431 Impact of Contaminating DNA in Whole-Genome Amplification Kits Used for  
432 Metagenomic Shotgun Sequencing for Infection Diagnosis. *J Clin Microbiol.*  
433 2017;55:1789–801.
- 434 19. Gargis AS, Kalman L, Lubin IM. Assuring the Quality of Next-Generation Sequencing in  
435 Clinical Microbiology and Public Health Laboratories. *J Clin Microbiol.* 2016;54:2857–  
436 65.
- 437 20. Hall RJ, Wang J, Todd AK, Bissielo AB, Yen S, Strydom H, et al. Evaluation of rapid and  
438 simple techniques for the enrichment of viruses prior to metagenomic virus discovery. *J*  
439 *Virol Methods.* 2014;195:194–204.
- 440 21. Conceição-Neto N, Zeller M, Lefrère H, De Bruyn P, Beller L, Deboutte W, et al.  
441 Modular approach to customise sample preparation procedures for viral metagenomics: a  
442 reproducible protocol for virome analysis. *Sci Rep.* 2015;5:16532.
- 443 22. Petty TJ, Cordey S, Padioleau I, Docquier M, Turin L, Preynat-Seauve O, et al.  
444 Comprehensive Human Virus Screening Using High-Throughput Sequencing with a  
445 User-Friendly Representation of Bioinformatics Analysis: a Pilot Study. *J Clin Microbiol.*  
446 2014;52:3351–61.
- 447 23. Mortazavi A, Williams BA, McCue K, Schaeffer L, Wold B. Mapping and quantifying  
448 mammalian transcriptomes by RNA-Seq. *Nat Methods.* 2008;5:621–8.
- 449 24. Dreier J, Störmer M, Kleesiek K. Use of Bacteriophage MS2 as an Internal Control in  
450 Viral Reverse Transcription-PCR Assays. *J Clin Microbiol.* 2005;43:4551–7.
- 451 25. Schlager R, Chiu CY, Miller S, Procop GW, Weinstock G, Professional Practice  
452 Committee and Committee on Laboratory Practices of the American Society for  
453 Microbiology, et al. Validation of Metagenomic Next-Generation Sequencing Tests for  
454 Universal Pathogen Detection. *Arch Pathol Lab Med.* 2017;141:776–86.
- 455 26. Zhou Y, Fernandez S, Yoon I-K, Simasathien S, Watanaveeradej V, Yang Y, et al.  
456 Metagenomics Study of Viral Pathogens in Undiagnosed Respiratory Specimens and  
457 Identification of Human Enteroviruses at a Thailand Hospital. *Am J Trop Med Hyg.*  
458 2016;95:663–9.
- 459 27. Thorburn F, Bennett S, Modha S, Murdoch D, Gunson R, Murcia PR. The use of next  
460 generation sequencing in the diagnosis and typing of respiratory infections. *J Clin Virol*  
461 *Off Publ Pan Am Soc Clin Virol.* 2015;69:96–100.
- 462 28. Yang J, Yang F, Ren L, Xiong Z, Wu Z, Dong J, et al. Unbiased Parallel Detection of  
463 Viral Pathogens in Clinical Samples by Use of a Metagenomic Approach<sup>▽</sup>. *J Clin*  
464 *Microbiol.* 2011;49:3463–9.
- 465 29. Pichon M, Gaymard A, Josset L, Valette M, Millat G, Lina B, et al. Characterization of  
466 oseltamivir-resistant influenza virus populations in immunosuppressed patients using  
467 digital-droplet PCR: Comparison with qPCR and next generation sequencing analysis.  
468 *Antiviral Res.* 2017;145:160–7.

469 **Table 1. Metagenomic NGS results for the validated respiratory samples tested positive with viral real-**  
 470 **time PCR.**

| Sample No.         | Real-time PCR Ct values |    | Viral genome type | mNGS results for targeted viruses <sup>a</sup> |              |         |             |
|--------------------|-------------------------|----|-------------------|------------------------------------------------|--------------|---------|-------------|
|                    |                         |    |                   | Identification                                 | No. of reads | RPKM    | Coverage(%) |
| 1                  | HRV/EV                  | 25 | linear ssRNA      | HRV-A19                                        | 13,061       | 5.5E+06 | 97.6        |
| 2                  |                         | 24 |                   | HRV-A19                                        | 29,743       | 8.2E+06 | 98.2        |
| 3                  |                         | 29 |                   | HRV-A63                                        | 2,672        | 1.4E+06 | 58.1        |
| 4                  |                         | 34 |                   | HRV-A56                                        | 453          | 1.4E+04 | 75.2        |
| 5                  | RSV                     | 27 |                   | RSV-B                                          | 14,218       | 1.9E+06 | 91.2        |
| 6                  |                         | 36 |                   | RSV-A                                          | 187          | 1.5E+03 | 22.0        |
| 7                  | MPV                     | 33 |                   | HMPV-A                                         | 44,556       | 9.1E+05 | 100.0       |
| 8                  | HCoV                    | 20 |                   | HCoV NL63                                      | 73,878       | 2.4E+06 | 94.2        |
| 9                  |                         | 24 |                   | HCoV 229E                                      | 19,615       | 1.1E+06 | 99.8        |
| 10                 |                         | 28 |                   | HCoV 229E                                      | 20,666       | 2.4E+05 | 100.0       |
| 12                 |                         | 36 |                   | HCoV NL63                                      | 1,815        | 1.3E+04 | 9.6         |
| 13                 | MV                      | 23 |                   | Measles Virus                                  | 289,019      | 9.1E+06 | 98.1        |
| 14                 | IBV                     | 23 |                   | Influenza B                                    | 42,212       | 1.1E+06 | 97.2        |
| 15                 | IAV                     | 27 | fragmented ssRNA  | Influenza A(H3N2)                              | 24,234       | 1.9E+05 | 78.6        |
| 16                 |                         | 34 |                   | Influenza A(H3N2)                              | 1,559        | 1.9E+04 | 21.2        |
| 17                 |                         | 35 |                   | Influenza A(H3N2)                              | 258          | 1.8E+03 | 26.5        |
| 18                 | HBoV                    | 24 | linear ssDNA      | HBoV-1                                         | 79,504       | 2.7E+06 | 100.0       |
| 20                 | AdV                     | 17 | linear dsDNA      | HAdVC-1                                        | 245,2476     | 1.6E+07 | 99.8        |
| 21                 |                         | 36 |                   | HAdVD-51                                       | 18           | 8.0E+01 | 0.6         |
| 22 <sup>b</sup>    |                         | 30 |                   | HAdVC-6                                        | 284          | 1.0E+03 | 6.2         |
|                    | HHV-6                   | 28 |                   | HHV-6B                                         | 18,411       | 1.4E+04 | 54.8        |
| 23 <sup>b</sup>    | HBoV                    | 15 | linear ssDNA      | HBoV-1                                         | 9,470,426    | 1.6E+08 | 100.0       |
|                    | CMV                     | 31 | linear dsDNA      | CMV                                            | 653          | 2.5E+02 | 5.3         |
| 24 <sup>b</sup>    | HBoV                    | 17 | linear ssDNA      | HBoV-1                                         | 7,966,089    | 1.1E+08 | 100         |
|                    | MPV                     | 29 | linear ssRNA      | HMPV-A                                         | 10,629       | 5.9E+04 | 95.7        |
| 25 <sup>b, c</sup> | AdV                     | 26 | linear dsDNA      | HAdVC-2                                        | 2,165        | 6.8E+03 | 12.4        |
|                    | HPIV                    | 26 | linear ssRNA      | HPIV-3                                         | 17,576       | 1.3E+05 | 66.7        |
|                    | HRV/EV                  | 34 |                   | HRV-C                                          | 446          | 7.0E+03 | 9.2         |
|                    | CMV                     | 27 | linear dsDNA      | CMV                                            | 34,577       | 1.7E+04 | 24.8        |
| 26 <sup>b</sup>    | HRV/EV                  | 26 | linear ssRNA      | HRV-A78                                        | 114,684      | 1.4E+07 | 99.9        |
|                    | AdV                     | 30 | linear dsDNA      | HAdVC-2                                        | 65           | 1.6E+03 | 9.6         |
|                    | RSV                     | 30 | linear ssRNA      | RSV-A                                          | 586          | 3.5E+04 | 68.7        |
| 27 <sup>b</sup>    | AdV                     | 32 | linear dsDNA      | HAdVC-2                                        | 24           | 1.3E+02 | 3.2         |
|                    | HPIV                    | 37 | linear ssRNA      | HPIV-2                                         | 50           | 6.3E+02 | 2.3         |
| 28 <sup>b</sup>    | HRV/EV                  | 31 |                   | HRV-A71                                        | 1,309        | 3.5E+04 | 61.3        |
|                    | EBV                     | 23 | linear dsDNA      | EBV                                            | 2,556        | 3.0E+03 | 39.3        |

471 HRV: human rhinovirus, EV: enterovirus, RSV: respiratory syncytial virus, HCoV: human coronavirus, HMPV: human  
 472 metapneumovirus, HPIV: human parainfluenza virus, MV: measles virus, HBoV: human bocavirus, AdV: adenovirus, HHV:  
 473 human herpes virus, CMV: cytomegalovirus, EBV: Epstein-Baar virus, Ct: Cycle threshold, RPKM: reads per kilobase of  
 474 virus reference sequence per million mapped reads (normalization of the number of reads mapping to a targeted viral  
 475 genome).

476 <sup>a</sup>Targeted viruses: viruses detected with real-time PCR.

477 <sup>b</sup>Multiple viral infections.

478 <sup>c</sup>Cross-checked on duplicate sample (deviation <0.5 log).

479 **Figure titles and legends**

480 **Fig. 1. Schematic representation of the metagenomic workflow and quality control steps.**

481 The whole process is summarized in the middle. On the left side, internal control (MS2 bacteriophage) is represented  
482 in blue, and external controls are represented in red, including positive control (MS2 bacteriophage spiked in viral  
483 transport medium) and No-Template Control (NTC: viral transport medium). Quality control testing 1 corresponds to  
484 MS2 bacteriophage molecular detection with commercial PCR assay. Quality control testing 2 corresponds to control  
485 by sequencing metrics (number of MS2 reads normalized with RPKM ratio and MS2 genome coverage). On the right,  
486 each technique used by phases is indicated black. In addition, on the far right the duration of each step is indicated.

487 **Fig. 2. Determination of optimal spiking level for internal quality control.**

488 The sensitivity of the metagenomic analysis workflow for MS2 bacteriophage (Internal Quality Control, IQC)  
489 detection was evaluated with a MS2 ten-fold serial dilutions in a nasopharyngeal swab tested negative with multiplex  
490 viral PCR. Relative abundance of MS2 bacteriophage and viral families are represented depending on the MS2 spiked-  
491 in concentration. IQCT1 corresponds to MS2 molecular detection with commercial real-time PCR assay after  
492 amplification step. IQCT2 corresponds to control by sequencing metrics (number of MS2 reads normalized with  
493 RPKM ratio and MS2 genome coverage).

494 **Fig. 3. Internal quality control detection after metagenomic analysis of the respiratory samples selected.**

495 Distribution of normalized read counts (RPKM) for MS2 bacteriophage (internal quality control, IQC) depending on  
496 the proportion of viral reads for the 37 respiratory samples selected. MS2 RPKM was determined after subtracting of  
497 NTC MS2 RPKM. IQC was not detected for 4/37 samples (represented in red); among them 3 samples were tested  
498 positive with viral real-time PCR.

499 **Fig. 4. Evaluation of the metagenomic NGS workflow according to the viral genome type.**

500 a) Correlation between the results of metagenomic NGS and viral real-time PCR for validated respiratory samples  
501 tested positive with viral PCR. Normalized number of reads (RPKM) obtained for targeted virus are displayed against  
502 the real-time PCR Ct values for fragmented ssRNA virus (influenza virus) linear dsDNA virus (adenovirus, Epstein-  
503 Baar virus, cytomegalovirus, human herpes virus-6) linear ssDNA (human bocavirus) and linear ssRNA (human  
504 rhinovirus, respiratory syncytial virus, parainfluenza virus, human coronavirus, human metapneumovirus and measles  
505 virus). The correlation coefficients are shown for each viral genome type. b) RPKM normalized by Ct for each viral  
506 genome type of validated respiratory samples tested positive with viral PCR. Bars show median and interquartile  
507 ranges, p-values calculated with the Mann-Whitney U test are shown.

508 **Titles and legends for additional files**

509 **Additional file 1. (Table.xls) Summary of clinical samples and metagenomic NGS information.**

510 **Additional file 2. (Table.xls) Quality control testing results.**

511 QCT1 corresponds to MS2 bacteriophage molecular detection with commercial real-time PCR assay. QCT2  
512 corresponds to control by sequencing metrics (number of MS2 reads normalized with RPKM ratio and MS2 genome  
513 coverage). MS2 RPKM for the 37 selected clinical samples was determined after subtracting of NTC MS2 RPKM.

514 **Additional file 3. (Figure.ppt) Metagenomic NGS results for duplicates of sample # 25.**

515 Sample # 25 corresponds to a clinical respiratory sample tested positive for 2 DNA viruses (adenovirus,  
516 cytomegalovirus) and 2 RNA viruses (human parainfluenza virus, human rhinovirus) using real-time PCR. This  
517 sample was analyzed twice using our single metagenomic workflow (replicate 1 and replicate 2). a) Pie charts show  
518 classification of reads into human, bacteria, viruses, fungi, archea and unknown categories (unassigned reads). b)  
519 Normalized read counts (RPKM) for each targeted virus (viruses detected with real-time PCR) and for internal quality  
520 control (MS2 bacteriophage). c) Coverage plot of targeted viral genomes and internal quality control (MS2  
521 bacteriophage). Sequencing reads were mapped on ezVIR viral database that identified human adenovirus C-2  
522 (accession number: KF268130.1), cytomegalovirus (accession number: GQ396662.1), human parainfluenza virus 3  
523 (accession number: KF687321.1), human rhinovirus C (accession number: JF317014.1) and MS2 bacteriophage  
524 (accession number: NC\_001417.2).

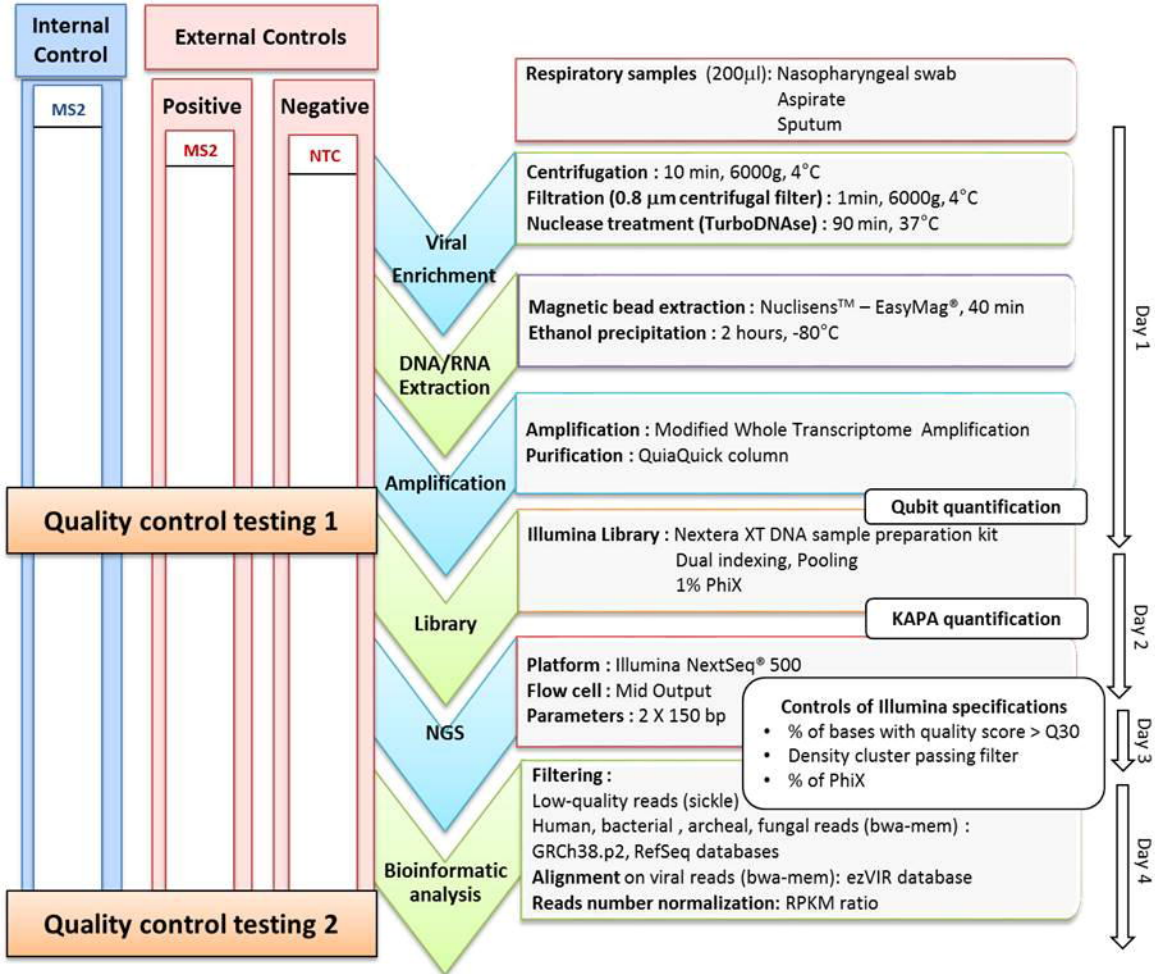

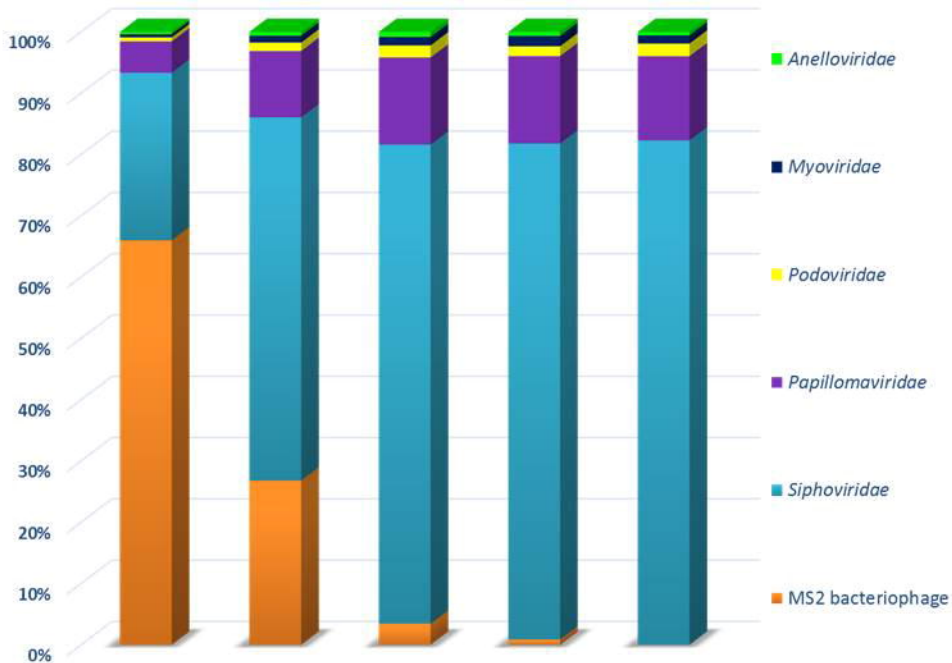

| MS2 spiking level |                 | 10 <sup>-2</sup> | 10 <sup>-3</sup> | 10 <sup>-4</sup> | 10 <sup>-5</sup> | Control |
|-------------------|-----------------|------------------|------------------|------------------|------------------|---------|
|                   | %MS2            | 66.0             | 26.8             | 3.4              | 0.9              | 0       |
|                   | IQCT1(Ct)       | 18               | 19               | 22               | 26               | No ct   |
| IQCT2             | MS2 RPKM        | 8.9E+06          | 2.4E+06          | 9.7E+05          | 4.1E+05          | 0       |
|                   | MS2 Coverage(%) | 98.5             | 95.7             | 95.2             | 69.6             | 0       |

%MS2, ratio of number of reads mapping to the MS2 bacteriophage genome to the total number of viral reads; IQCT, internal quality control testing; MS2 RPKM: reads per kilobase of MS2 bacteriophage sequence per million mapped reads; Ct, Cycle threshold. Control, no spike in.

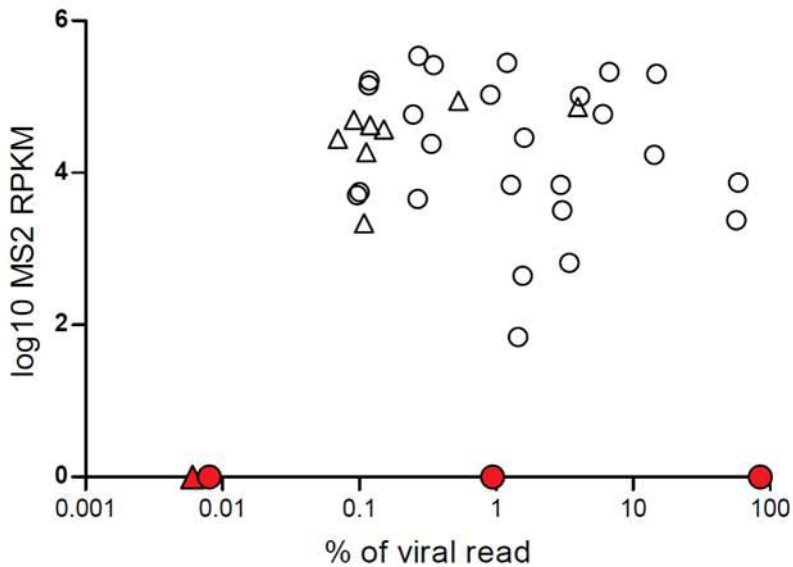

MS2 RPKM, reads per kilobase of MS2 bacteriophage sequence per million mapped reads; triangles indicate samples tested negative with viral real-time PCR, circles indicate samples tested positive; % of viral reads, ratio of number of reads mapping to viral genome to the total number of reads.



**a**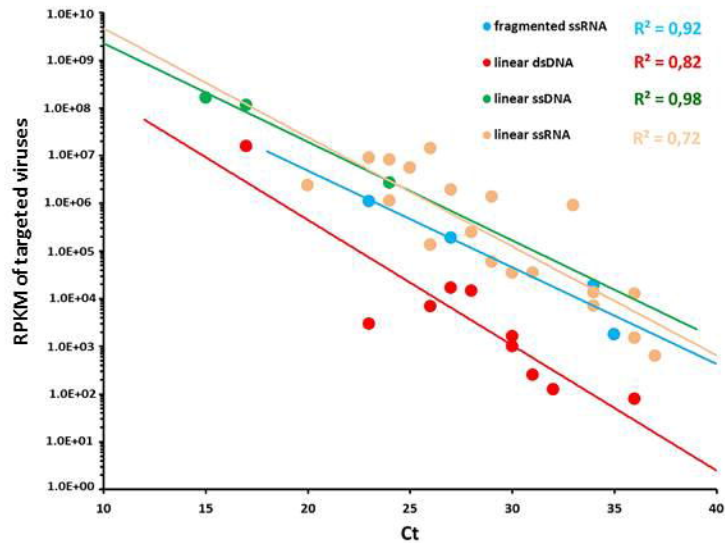**b**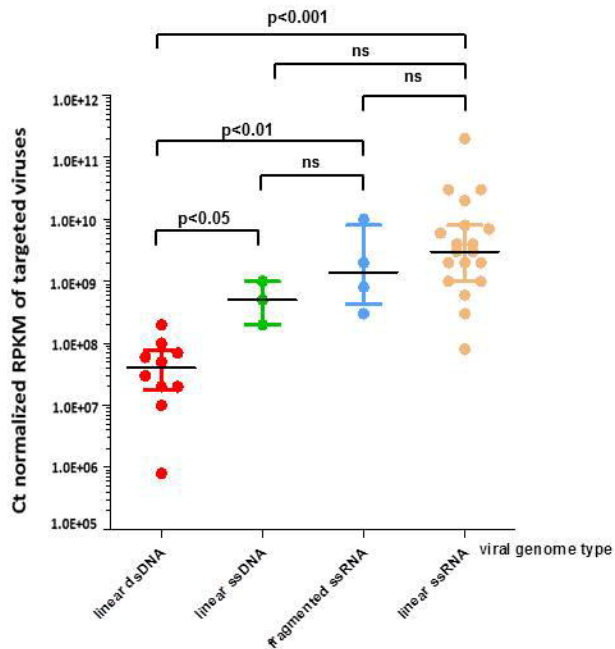

RPKM, reads per kilobase of targeted viral sequence per million mapped reads; Targeted viruses: viruses detected with viral real-time PCR; Ct, Cycle threshold; ns, no significant.
